# Supplementary material for: A polylactic acid–carbon nanofiber-based electro-conductive sensing material and paper-based colorimetric sensor for detection of nitrates
Source: Royal Society of Chemistry journal article supplement (doi:10.1039/d3ay02069j), 2024-01-01
Supplement: d3ay02069j1.pdf [file d3ay02069j1.pdf]

ARTICLE

1 **Polylactic acid-carbon nanofiber-based electro-conductive sensing material and paper-based**  
2 **colorimetric sensor for detection of nitrates**

3 Pawankumar Rai <sup>a, #</sup>, Srishti Mehrotra <sup>a, c, #</sup>, Krishna Gautam <sup>b, c</sup>, Rahul Verma <sup>c, e</sup>, Sadasivam  
4 Anbumani <sup>b, e</sup>, Satyakam Patnaik <sup>c, e</sup>, Smriti Priya <sup>d</sup>, Sandeep K. Sharma <sup>a, e\*</sup>

5 <sup>a</sup> Food Toxicology Group, CSIR - Indian Institute of Toxicology Research, Vishvigyan Bhawan,  
6 31, Mahatma Gandhi Marg, Lucknow-226001, Uttar Pradesh, India.

7 <sup>b</sup> Environmental Toxicology Group, CSIR-Indian Institute of Toxicology Research, Vishvigyan  
8 Bhawan, 31, Mahatma Gandhi Marg, Lucknow 226001, Uttar Pradesh, India.

9 <sup>c</sup> Drug & Chemical Toxicology Group, CSIR - Indian Institute of Toxicology Research,  
10 Vishvigyan Bhawan, 31, Mahatma Gandhi Marg, Lucknow-226001, Uttar Pradesh, India

11 <sup>d</sup> Systems Toxicology Group, CSIR - Indian Institute of Toxicology Research, Vishvigyan  
12 Bhawan, 31, Mahatma Gandhi Marg, Lucknow-226001, Uttar Pradesh, India

13 <sup>e</sup> Academy of Scientific and Industrial Research (AcSIR), Ghaziabad- 201002, India.

14

15 <sup>#</sup> Equal contribution

16

17

18

19

20

21 **\*Corresponding Author**

22 Dr. Sandeep K. Sharma

23 CSIR-Indian Institute of Toxicology Research

24 31, Mahatma Gandhi Marg

25 Lucknow - 226 001

26 Uttar Pradesh, INDIA

27 E-mail: [sharma.sandeep@iitr.res.in](mailto:sharma.sandeep@iitr.res.in)

28 [sandeep.sks@gmail.com](mailto:sandeep.sks@gmail.com)

30 (a)

| S. No. | Exposure Concentration (mg/L) | Algal cell density |         | Total number of cells (72h-0h) | % Inhibition of Yield at 72 h |
|--------|-------------------------------|--------------------|---------|--------------------------------|-------------------------------|
|        |                               | 0h                 | 72h     |                                |                               |
| 1      | 0                             | 52542              | 1018750 | 966208                         | 0                             |
| 2      | 100                           | 52542              | 1050000 | 997458                         | -3.23429                      |

31

32

| S. No. | Exposure concentration (mg/L) | Mean of section-by-section growth rate at 72h | % Inhibition of growth rate 72 h |
|--------|-------------------------------|-----------------------------------------------|----------------------------------|
| 1      | 0                             | 2.964349                                      | 0                                |
| 2      | 100                           | 2.994775                                      | -1.02638                         |

33 (b)

34

35 **Supplementary Table 1.** Effects of CNF membrane on percent inhibition of growth rate (a) and  
 36 Yield (b) of *Pseudokirchneriella subcapitata* after short-term exposure to limit dose (100 mg/L).

37

| S. No. | Test Organism           | Exposure concentration | Duration | % Survival |      |      |      |      | Cumulative % Survival |
|--------|-------------------------|------------------------|----------|------------|------|------|------|------|-----------------------|
|        |                         |                        |          | 0 h        | 24 h | 48 h | 72 h | 96 h |                       |
| 1      | Danio rerio (Zebrafish) | 100 mg/L (Limit test)  | 96 h     | 100        | 100  | 100  | 100  | 100  | 100                   |

38

39 **Supplementary Table 2.** Effects of CNF membrane on the survival rate of adult zebrafish after  
40 short-term exposure to limit dose (100 mg/L).

41

| S. No. | Test Organism                        | Exposure concentration   | Duration | % Survival |       |       | Cumulative % Survival |
|--------|--------------------------------------|--------------------------|----------|------------|-------|-------|-----------------------|
|        |                                      |                          |          | 0 h        | 24 h  | 48 h  |                       |
| 1      | <i>D. magna</i> (<24 h old daphnids) | 100 mg/L<br>(Limit test) | 48 h     | 100 %      | 100 % | 100 % | 100 %                 |

42

43 **Supplementary Table 3.** Effects of CNF membrane on the survival rate of Daphnids after Short  
 44 term exposure to limit test concentrations (100 mg/L).

45

| S. No. | Existing technologies for the detection of nitrates                                                             | Linear range (ppm)                        | Detection limit (ppm) | Ref. |
|--------|-----------------------------------------------------------------------------------------------------------------|-------------------------------------------|-----------------------|------|
| 1      | Flow-injection with luminol chemiluminescence detection                                                         | $2 \times 10^{-5}$ to $5 \times 10^{-2}$  | $2 \times 10^{-5}$    | [1]  |
| 2      | HPLC with UV absorption (HPLC/DAD)                                                                              | 5-35                                      | $4 \times 10^{-3}$    | [2]  |
| 3      | UV-Irradiated Photochemical Conversion to Peroxynitrite and Ion Chromatography-Luminol Chemiluminescence System | $6 \times 10^{-5}$ to $18 \times 10^{-2}$ | $1.8 \times 10^{-3}$  | [3]  |
| 4      | Electrothermal atomic absorption spectrometry                                                                   | $1 \times 10^{-4}$ to $25 \times 10^{-3}$ | $1.3 \times 10^{-5}$  | [4]  |
| 5      | Two-electrode interdigitated sensors (IDEs)                                                                     | 4 to 14                                   | 4                     | [5]  |
| 6      | UV spectroscopy                                                                                                 | 0.08 to 4.0                               | 0.04                  | [6]  |
| 7      | Ambient-pressure helium-plasma ionization-mass spectrometry (HePI-MS)                                           | 0.02 to 20                                | $2 \times 10^{-4}$    | [7]  |
| 8      | Capillary electrophoresis technique                                                                             | 16.1 to 285                               | 0.027                 | [8]  |
| 9      | Present study (Electrochemical sensor)                                                                          | 78 to $5 \times 10^3$                     | 0.046                 |      |
| 10     | Present study (Paper-based colorimetric sensor)                                                                 | $1.56 \times 10^2$ to $10 \times 10^3$    | $1.56 \times 10^2$    |      |

46

47 **Supplementary Table 4.** Comparative table of existing technologies and developed technologies for  
 48 the detection of nitrates.

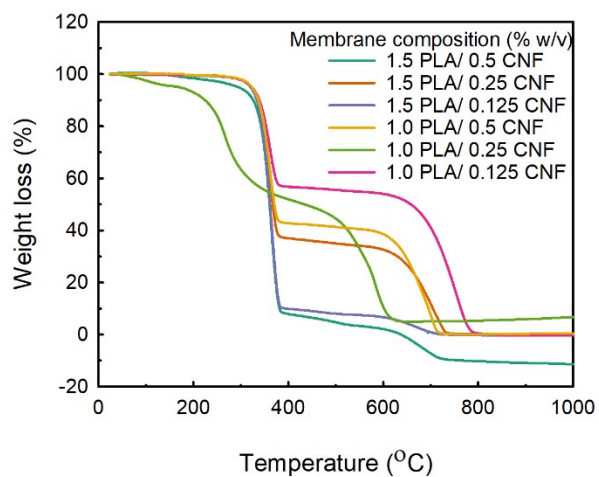

49

50 **Supplementary Figure. 1:** TGA analysis of membranes composed of different concentrations of  
51 PLA and CNF.

52

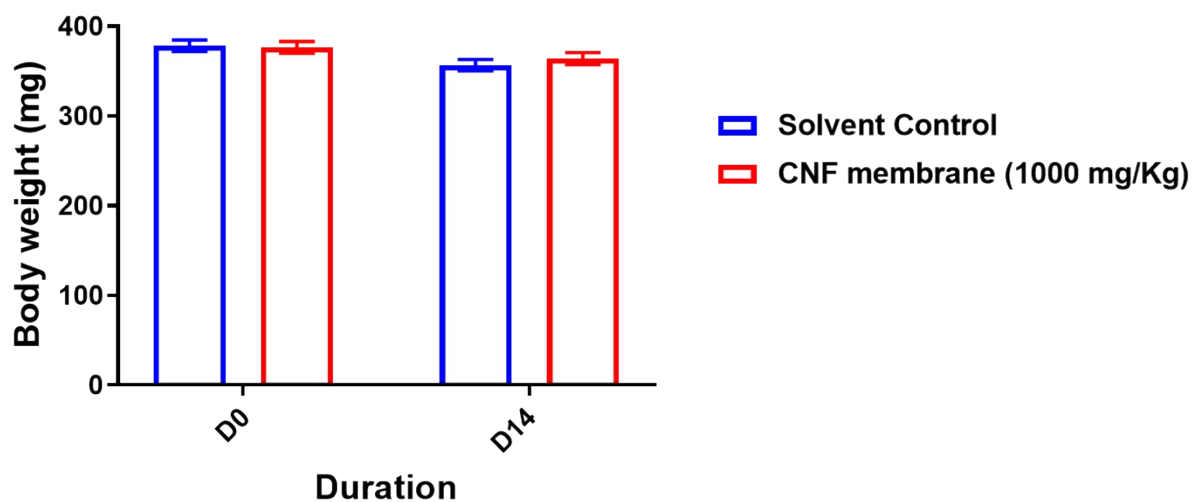

53

54

55 **Supplementary Figure. 2.** No significant changes in body weight were observed ( $p > 0.05$ ) in the  
56 earthworm (*Eisenia fetida*) after short-term exposure to CNF membrane. Values expressed in  
57 mean  $\pm$  SEM.

58

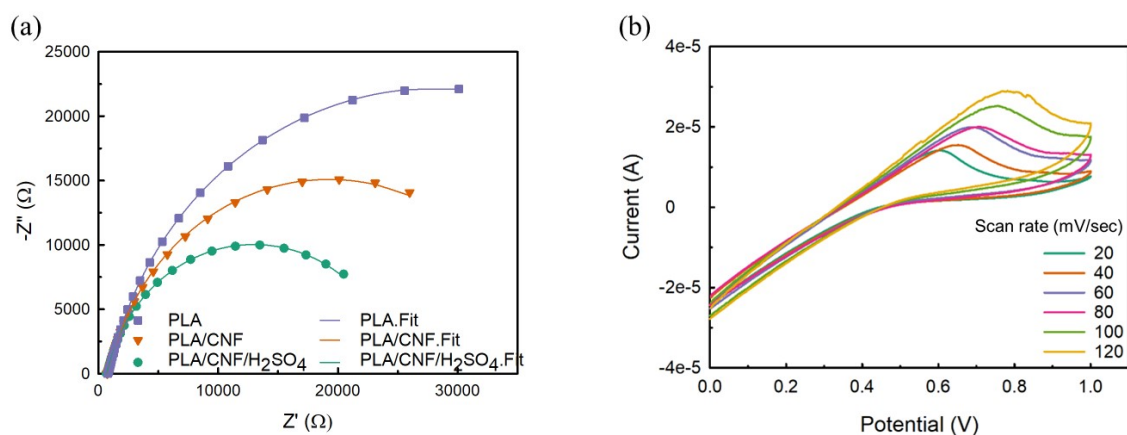

59

60 **Supplementary Figure. 3:** Electrochemical behavior of membrane in the presence of one-electron  
 61 redox system of  $\text{Fe}(\text{CN})_6^{3-} / \text{Fe}(\text{CN})_6^{4-}$  (a) Nyquist plot shows reduced resistance to charge transfer  
 62 on electrode surface after treatment with acid. PLA membrane had an  $R_{ct}$  of  $36893\Omega$ . The  
 63 introduction of CNF to the membrane resulted in a decrease in the  $R_{ct}$  to  $27135\Omega$ . Further  
 64 activation of PLA/CNF membrane with  $\text{H}_2\text{SO}_4$  resulted in an  $R_{ct}$  of  $19200\Omega$ . A decrease in the  
 65  $R_{ct}$  value is indicative of the increased charge movement along the surface of the membrane. (b)  
 66 Cyclic voltammogram of acid-activated PLA/CNF membrane at scan rate 20-120  $\text{mV s}^{-1}$  showed  
 67 an increase in  $I_p$  on increasing the scan rate.

68



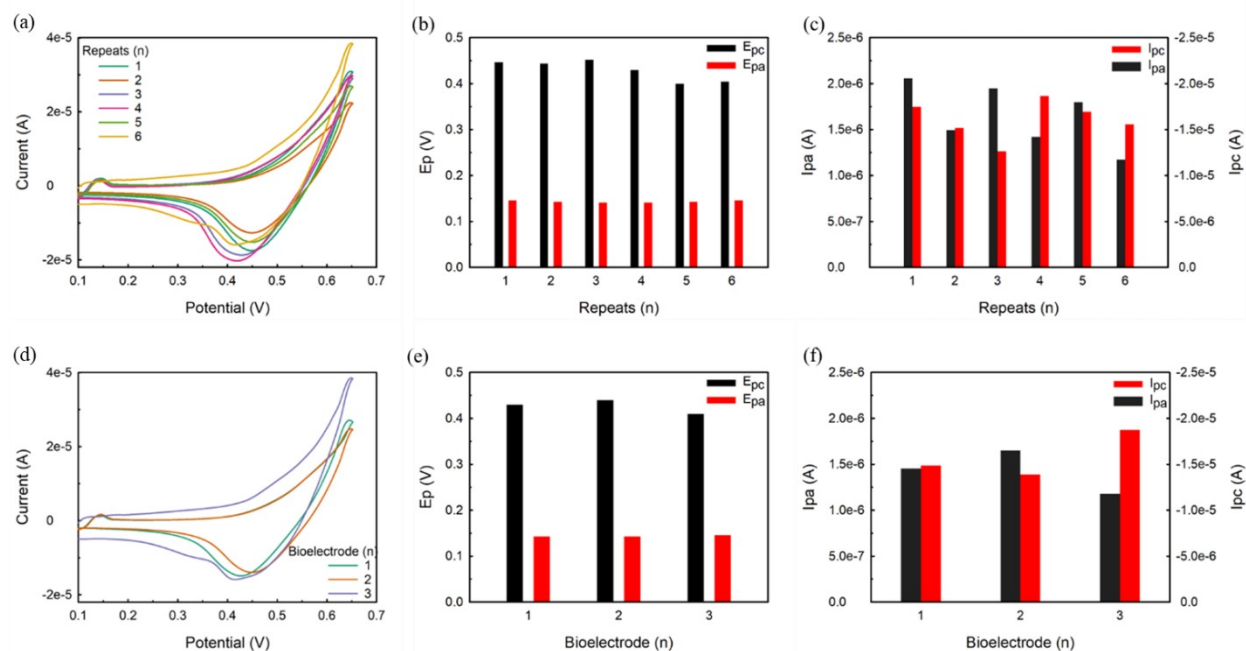

69

70 **Supplementary Figure. 4:** (a) Cyclic voltammogram showing repeatability (n=6) of bio-based  
 71 electrode tested with 10000 ppm of CAN in the presence of test solution. (b) Peak potential vs.  
 72 repeat (n) showing non-significant variation in potential ( $E_{pa}$ : +0.15 V and  $E_{pc}$ : 0.42V). (c) Peak  
 73 current vs repeat (n) showing non-significant variation in current ( $I_{pa}$  and  $I_{pc}$ ). (d) Cyclic  
 74 voltammogram showing reproducibility (n=3) of bio-based electrode tested with 10000 ppm of  
 75 CAN in the presence of test solution. (e) Peak potential vs. bio-based electrode (n) showing non-  
 76 significant variation in potential ( $E_{pa}$ : +0.15 V and  $E_{pc}$ : 0.42V). (f) Peak current vs bio-based  
 77 electrode (n) showing non-significant variation in current ( $I_{pa}$  and  $I_{pc}$ ).

78

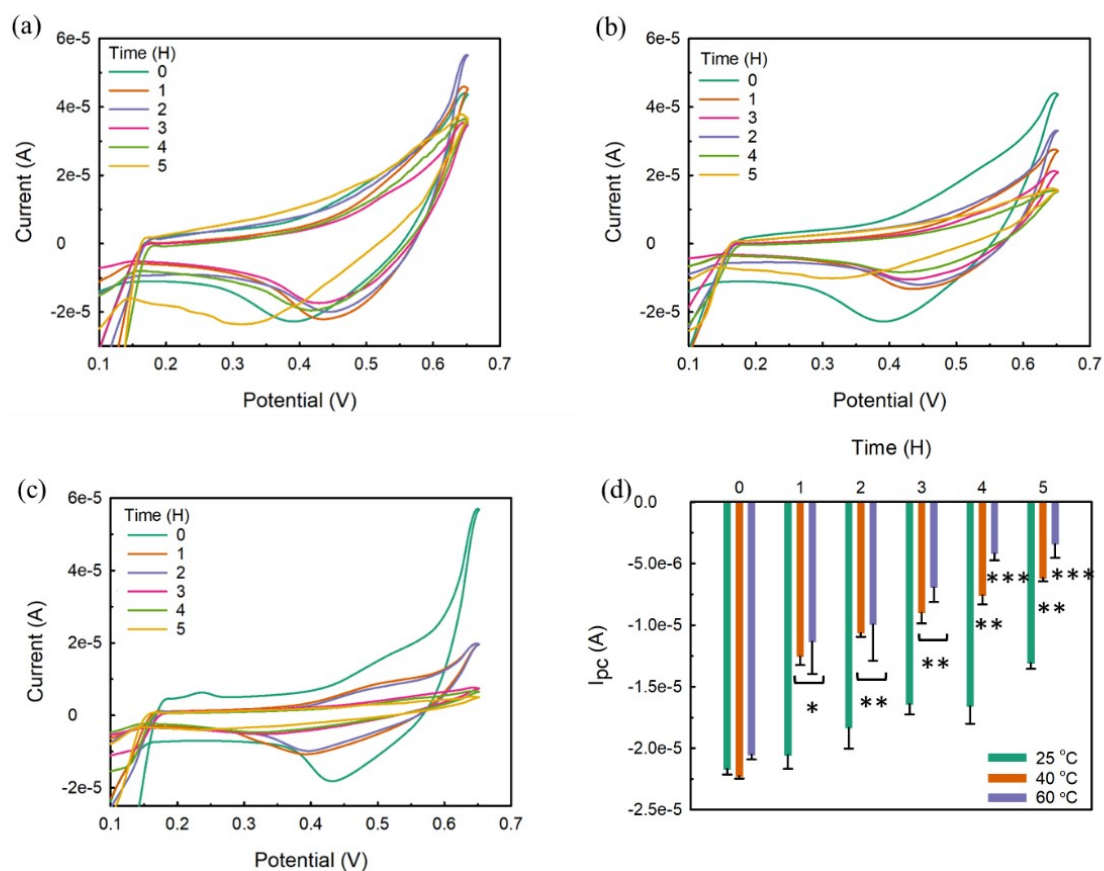

79

80

81 **Supplementary Figure. 5:** Cyclic voltammogram of bio-based electrode in the presence of test  
 82 solution after storage at (a) 25, (b) 40 and (c) 60 °C. (d) Stability of the bio-based electrode tested  
 83 with 10000 ppm of CAN where \*:  $p < 0.05$ ; \*\*:  $p < 0.01$ ; \*\*\*:  $p < 0.001$ .

84

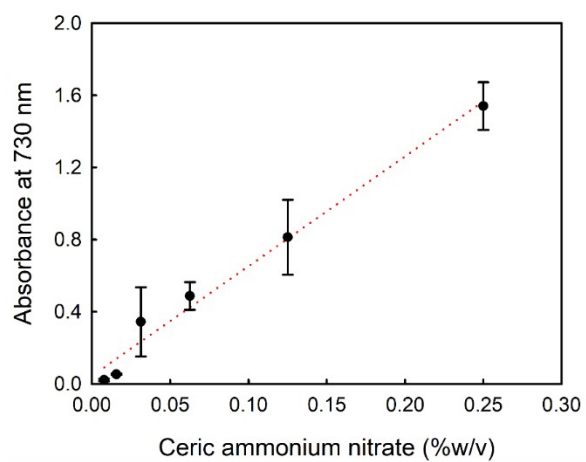

85

86 **Supplementary Figure. 6:** Dose-response of test solution and Ceric ammonium nitrate observed  
87 at 730 nm.

88

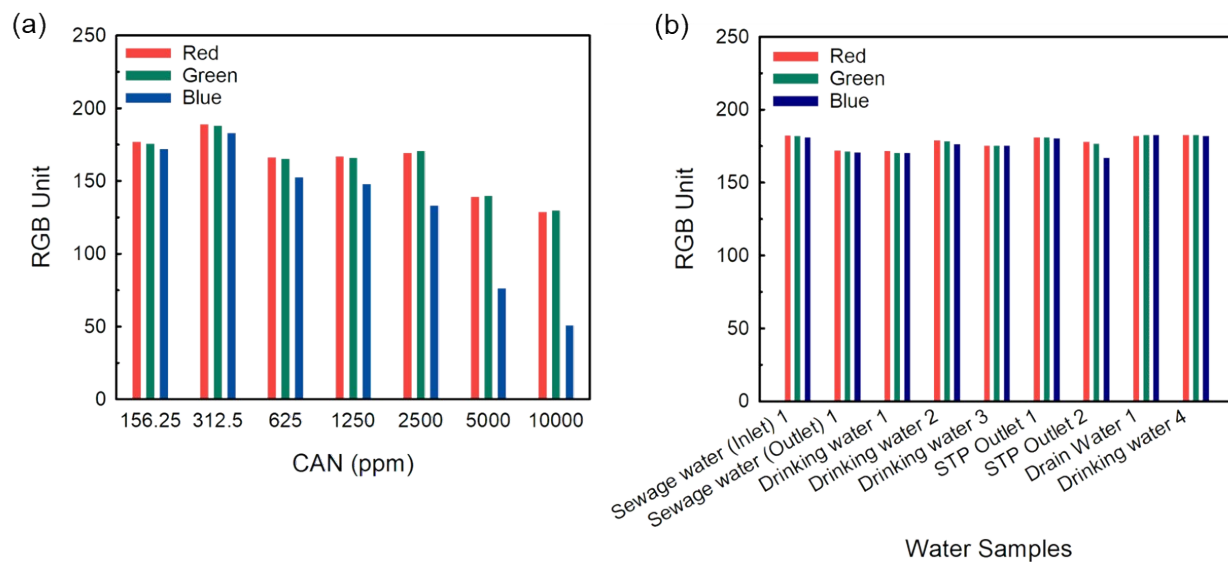

89

90 **Supplementary Figure. 7:** RGB analysis of chromogenic test strips tested with (a) ceric  
91 ammonium nitrate standards and (b) water samples.

92

93

94 **References**

- 95 [1] M. Yaqoob, B. Folgado Biot, A. Nabi, P.J. Worsfold, Determination of nitrate and nitrite in freshwaters  
96 using flow-injection with luminol chemiluminescence detection, *Luminescence*, 27 (2012) 419-425.
- 97 [2] M. Tatarczak-Michalewska, J. Flieger, J. Kawka, W. Plazinski, W. Flieger, E. Blicharska, D. Majerek,  
98 HPLC-DAD Determination of Nitrite and Nitrate in Human Saliva Utilizing a Phosphatidylcholine  
99 Column, *Molecules*, 24 (2019).
- 100 [3] H. Kodamatani, S. Kubo, A. Takeuchi, R. Kanzaki, T. Tomiyasu, Sensitive Detection of Nitrite and  
101 Nitrate in Seawater by 222 nm UV-Irradiated Photochemical Conversion to Peroxynitrite and Ion  
102 Chromatography-Luminol Chemiluminescence System, *Environmental Science & Technology*, 57  
103 (2023) 5924-5933.
- 104 [4] R. Roohparvar, T. Shamspur, A. Mostafavi, H. Bagheri, Indirect ultra-trace determination of nitrate and  
105 nitrite in food samples by in-syringe liquid microextraction and electrothermal atomic absorption  
106 spectrometry, *Microchemical Journal*, 142 (2018) 135-139.
- 107 [5] M.E.E. Alahi, N. Afsarimanesh, S.C. Mukhopadhyay, L. Burkitt, Development of the selectivity of  
108 nitrate sensors based on ion imprinted polymerization technique, 2017 Eleventh International  
109 Conference on Sensing Technology (ICST), 2017, pp. 1-6.
- 110 [6] A.C. Edwards, P.S. Hooda, Y. Cook, Determination of Nitrate in Water Containing Dissolved Organic  
111 Carbon by Ultraviolet Spectroscopy, *International Journal of Environmental Analytical Chemistry*, 80  
112 (2001) 49-59.
- 113 [7] J. Pavlov, A.B. Attygalle, Direct Detection of Inorganic Nitrate Salts by Ambient Pressure Helium-  
114 Plasma Ionization Mass Spectrometry, *Analytical Chemistry*, 85 (2013) 278-282.
- 115 [8] N. Kamilova, Z. Kalaycıoğlu, A. Gölcü, Sample Stacking–Capillary Electrophoretic Analysis of Nitrate  
116 and Nitrite in Organic- and Conventional-Originated Baby Food Formulas from Turkey, *ACS Omega*,  
117 8 (2023) 5097-5102.

118
